# Supplementary material for: ZnIO3(OH): a new layered noncentrosymmetric polar iodate – hydrothermal synthesis, crystal structure, and second-harmonic generating (SHG) properties
Source: Royal Society of Chemistry journal article supplement (doi:10.1039/c2dt30947e), 2012-01-01

Electronic Supplementary Information (ESI) for:

ZnIO<sub>3</sub>(OH): A new layered noncentrosymmetric polar  
iodate - hydrothermal synthesis, crystal structure, and  
second-harmonic generating (SHG) properties

*Dong Woo Lee, Saet Byeol Kim, and Kang Min Ok\**

Department of Chemistry, Chung-Ang University, 221 Heukseok-dong, Dongjak-gu, Seoul 156-756,  
Republic of Korea

- S1. Experimental and calculated powder X-ray diffraction patterns for ZnIO<sub>3</sub>(OH)
- S2. IR spectrum for ZnIO<sub>3</sub>(OH)

S1. Experimental and calculated powder X-ray diffraction patterns for  $\text{ZnIO}_3(\text{OH})$

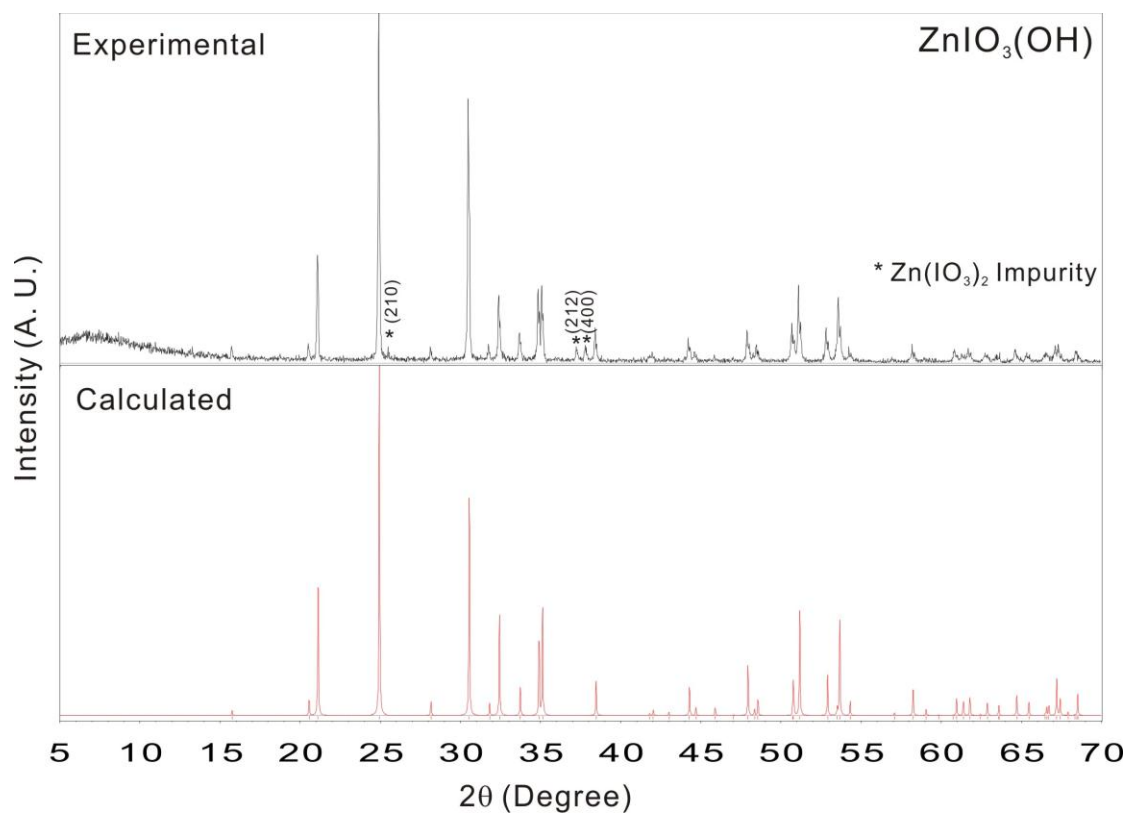

S2. IR spectrum for  $\text{ZnIO}_3(\text{OH})$

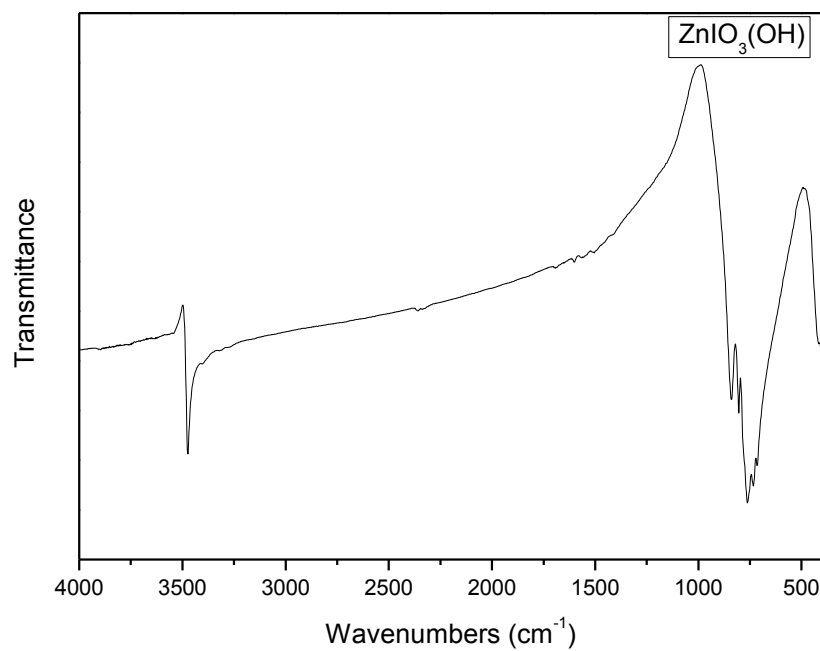

Supplement: c2dt30947e.pdf [file c2dt30947e.pdf]
